# Supplementary material for: The Effectiveness and Cost Outcomes of Korean Medicine for Anxiety Disorders: A Retrospective Case Series Study
Source: Preprints.org preprint supplement (doi:10.20944/preprints202405.0599.v1), 2024-05-09
Supplement: Supplementary file 1 [file supplementary]

Supplementary Materials

| **Scale** | | **Description** | **Number of items** |
| --- | --- | --- | --- |
| **Anxiety** | | |  |
| State-Trait Anxiety  Inventory (STAI) | STAI-X 1(state) | Current level of anxiety | 20 |
| STAI-X 2 (trait) | The level of personality-based anxiety experienced in daily life | 20 |
| Beck Anxiety Inventory (BAI) | | The severity of anxiety with a focus on somatic symptoms designed to distinguish anxiety symptoms from depressive symptoms | 21 |
| **Anger** | | |  |
| State-Trait Anger Expression Inventory State (STAXI) | STAXI-S (state) | Current level of anger | 10 |
| STAXI-T (trait) | The level of personality-based anxiety experienced in daily life | 10 |
| Anger Expression  Inventory (AXI) | AXI-K-I  (anger-in) | Suppressing or hold anger in rather than expressing it | 8 |
| AXI-K-O  (anger-out) | The outward expression of anger toward other people or things either verbally or physically | 8 |
| AXI-K-C  (anger-control) | Ability to control angry feelings | 8 |
| **Depression** | | |  |
| Beck Depression Inventory-II (BDI II) | | The level of depression | 21 |
| **Optimism** | | | |
| The revised Life Orientation Test (LOT-R) | | Measuring positive expectations towards the future | 10 |
| **Satisfaction** | | |  |
| The Satisfaction with Life Scale (SWLS) | | Measuring current life satisfaction | 7 |
| The Life Satisfaction Expectancy Scale (LSES) | | Measuring anticipated satisfaction with future life | 7 |
| The Life Satisfaction Motivation Scale (LSMS) | | Measuring motivation for life satisfaction | 7 |

Table S1. Detailed description of anxiety-related scales

Table S2. Detailed description of anxiety-related scales

|  | **Male** | **Female** |
| --- | --- | --- |
| N (%) | 25 (37.3) | 42 (62.7) |
| Age  (mean±SD) | 33.2±10.7 | |
| 35.2±11.2 | 31.2±9.8 |
| **Type (%)** | | |
| GAD | 30 (44.8) | |
| PD | 26 (38.8) | |
| PTSD | 2 (3.0) | |
| SAD | 9 (13.4) | |

GAD, generalized anxiety disorder; PD, panic disorder; PTSD, posttraumatic stress disorder; SAD, social anxiety disorder; SD, standard deviation;

**Table S3.** The difference of outcomes for post treatment of 4 weeks between males and female

|  | **Range** | **Male (n=25)** | | **Female (n=42)** | |
| --- | --- | --- | --- | --- | --- |
| **Improvement from baseline (%)** | **p-value** | **Improvement from baseline (%)** | **p-value** |
| **Anxiety** | |  | |  |  |
| STAI X-1# | 20-100 | 15.3 | <0.001*** | 14.2 | <0.001*** |
| STAI X-2# | 20-100 | 7.7 | 0.003*** | 10.8 | <0.001*** |
| BAI# | 21-63 | 22.0 | <0.001*** | 22.7 | <0.001*** |
| **Anger** | |  | |  |  |
| STAXI-S# | 10-40 | 7.3 | 0.022*** | 1.3 | 0.698 |
| STAXI-T# | 10-40 | 3.2 | 0.332 | 2.5 | 0.437 |
| AXI-K-I# | 8-32 | 4.2 | 0.125 | 5.6 | 0.046*** |
| AXI-K-O# | 8-32 | 5.5 | 0.007 *** | 1.6 | 0.455 |
| AXI-K-C | 8-32 | 3.3 | 0.862 | 0.4 | 0.865 |
| **Depression** | |  | |  |  |
| BDI II # | 0-63 | 9.5 | 0.002*** | 12.5 | <0.001*** |
| **Optimism** | |  | |  |  |
| LOT-R | 6-30 | 4.5 | 0.067 | 2.8 | 0.114 |
| **Satisfaction** | |  | |  |  |
| LSMS | 5-35 | 0.4 | 0.891 | 0.3 | 0.864 |
| SWLS | 5-35 | 0 | 1.000 | 1.4 | 0.401 |
| LSES | 5-35 | 7.9 | 0.019*** | 5.2 | 0.057 |
| **Quality of life** | |  | |  |  |
| EQ-5D | 0-1 | 3.5 | 0.042*** | 11.4 | <0.001*** |
| EQ-VAS | 0-100 | 7.0 | 0.021*** | 14.7 | <0.001*** |

AXI-K-C, Anger Expression Inventory Anger-Control; AXI-K-I, Anger Expression Inventory Anger-In; AXI-K-O, Anger Expression Inventory Anger-Out; BAI, Beck Anxiety Inventory; BDI II, Beck Depression Inventory-II; EQ-VAS, EuroQoL Visual Analog Scale; EQ-5D, Euro Quality of Life 5 Dimensions utility score; LOT-R, The Revised Life Orientation Test; LSES, The Life Satisfaction Expectancy Scale; LSMS, The Life Satisfaction Motivation Scale; STAI, State-Trait Anxiety Inventory, axis1 (X-1, State), axis2 (X-2, Trait); STAXI-S, State-Trait Anger Expression Inventory State Anger; STAXI-T, State-Trait Anger Expression Inventory Trait Anger; SWLS, The Satisfaction with Life Scale. # A lower score indicates a higher degree of symptoms. *** p<0.05

Table S4. The unit or cost of Korean Medicine for patients for 4 weeks and 12 weeks (KRW)

| **Item** | **4 weeks treatment (n=67)** | | | | | **1-4 weeks treatment (n=36)** | | | | | **5~12 weeks treatment (n=36)** | | | | |
| --- | --- | --- | --- | --- | --- | --- | --- | --- | --- | --- | --- | --- | --- | --- | --- |
| Mean | Standard deviation | Total | Minimum | Maximum | Mean | Standard deviation | Total | Minimum | Maximum | Mean | Standard deviation | Total | Minimum | Maximum |
| Visit (Count) | 5.1 | 1.6 | 339 | 2 | 9 | 5.2 | 1.5 | 188 | 2.0 | 9.0 | 5.9 | 2.9 | 214.0 | 2.0 | 15.0 |
| Consultation fee | 50,395 | 14,254 | 3,376,430 | 26,530 | 89,200 | 52,655.3 | 12,681 | 1,895,590 | 26,530 | 80,240 | 52,849 | 24,039 | 1,902,590 | 21,160 | 120,870 |
| **Costs of a diagnostic test** | | | | | | | | | | | | | | | |
| Pattern identification | 13,415 | 3,593 | 898,800 | 3,15`0 | 22,050 | 14,460 | 3,440 | 520,590 | 5,880 | 22,050 | 15,563 | 5,329 | 560,280 | 6,300 | 26,460 |
| Past psychiatric history | 8,153 | 221 | 546,240 | 7,920 | 8,550 | 8,128 | 225 | 292,610 | 7,920 | 8,550 | - | - | - | - | - |
| Heart Rate Variability | 3,574 | 73 | 239,440 | 3,440 | 3,650 | 3,581 | 74. | 128,940 | 3,440 | 3,650 | - | - | - | - | - |
| Personality test | 13,941 | 2,485 | 934,030 | - | 14,950 | 14,336 | 329 | 516,120 | 14,030 | 14,950 | - | - | - | - | - |
| **Costs of treatments** | | | | | | | | | | | | | | | |
| Acupuncture | 87,335 | 29,267 | 5,852,750 | 17,520 | 169,740 | 92,567 | 29,112 | 3,332,420 | 35,040 | 169,740 | 106,551 | 53,099 | 3,835,860 | 35,220 | 262,800 |
| Korean medicine psychotherapy | 82,789 | 27,993 | 5,546,870 | 40,800 | 215,070 | 80,510 | 17,383 | 2,898,390 | 40,800 | 129,220 | 76,618 | 39,550 | 2,758,270 | 24,900 | 180,300 |
| Family therapy | 13,998 | 22,565 | 937,850 | - | 79,650 | 19,346 | 26,280 | 696,480 | 0 | 79,650 | 11,393 | 21,326 | 410,150 | 0 | 65,920 |
| Chuna therapy | 55,705 | 80,007 | 3,732,200 | - | 263,790 | 64,173 | 90,177 | 2,310,260 | 0 | 263,790 | 66,520 | 100,575 | 2,394,750 | 0 | 351,720 |
| Herbal medicine* | 1,300,000 | 430,204 | 87,100,000 | 300,000 | 2,700,000 | 1,381,944 | 396,079 | 49,750,000 | 300,000 | 2,700,000 | 133,333 | 326,671 | 4,800,000 | 0 | 1,300,000 |
| Aromatherapy* | 59,188 | 19,968 | 3,965,600 | 23,400 | 124,200 | 58,516 | 16,127 | 2,106,600 | 23,400. | 92,700 | 58,277 | 32,720 | 2,098,000 | 15,200 | 151,000 |
| Total reimbursement cost | 329,325 | | | | | 349,761 | | | | | 329,497 | | | | |
| Total non  reimbursement cost | 1,359,188 | | | | | 1,440,461 | | | | | 191,611 | | | | |
| Total cost | 1,688,513 | | | | | 1,790,222 | | | | | 521,108 | | | | |

*: Herbal medicine and aromatherapy was not reimbursed.


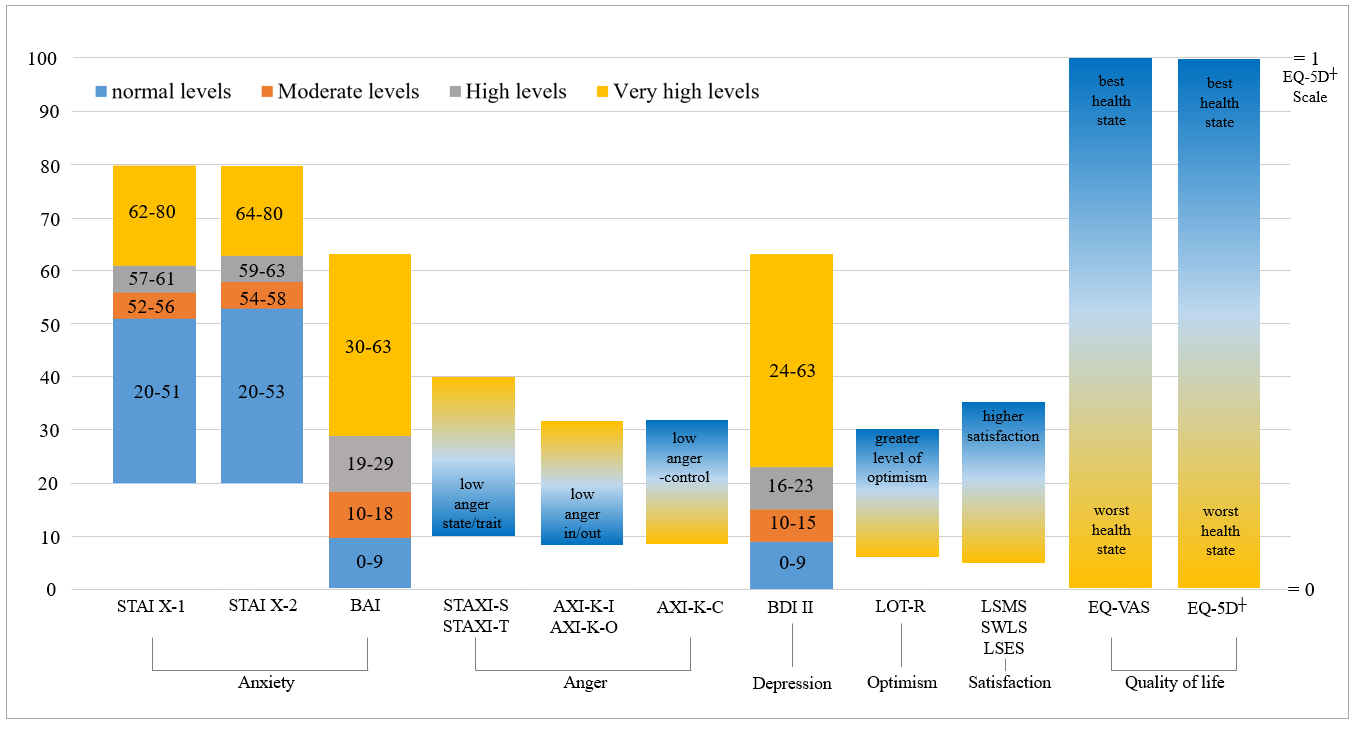


Figure S1. Psychological and health-related quality of life measures


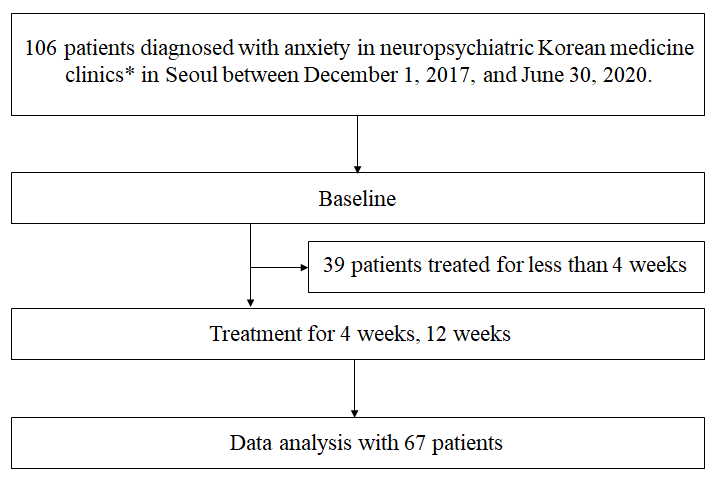


Figure S2. Flowchart of the study

*Among patients who visited two clinics in Seoul for treatment, 96 were recruited from one clinic and 10 from the other clinic.


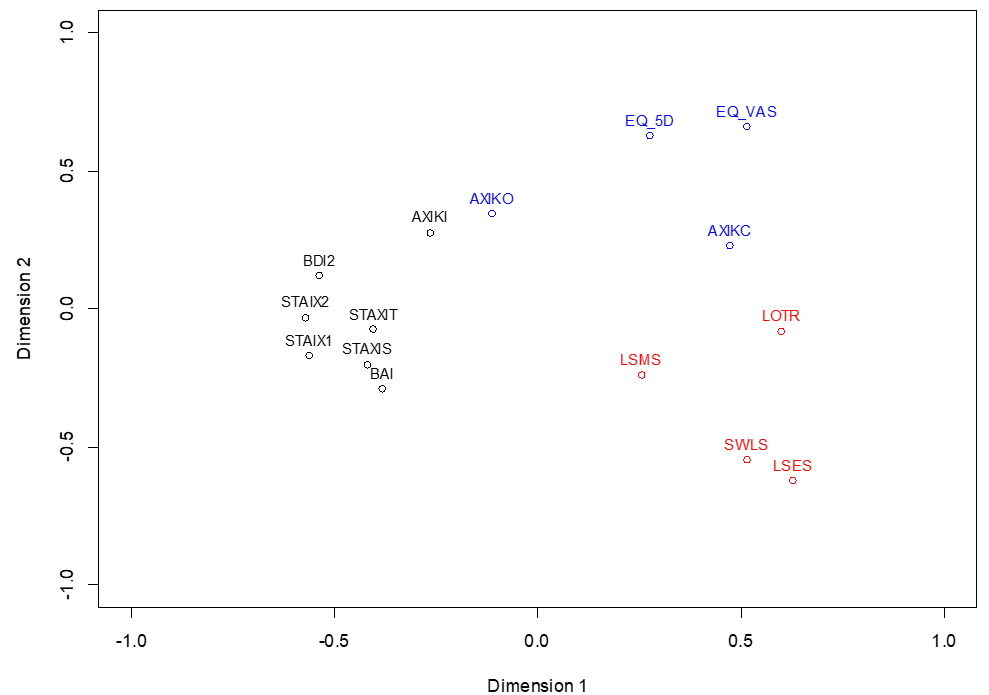


Figure S3. Plot of multidimensional scaling analysis, based on the clinic data
